# Supplementary material
Source: publisher figshare collection journal article supplement (https://tandf.figshare.com/articles/dataset/_/1603322)

**Appendix S3** The orange-fronted parakeet (*Cyanoramphus malherbi* Souance, 1857) Metz Museum syntype. **A**; Anterior view; **B**: Right lateral view; **C**: Left lateral view; **D**; Posterior view; **E**: Right lateral view showing orange rump spot; **F**: Specimen label on the base of the mount. Photos courtesy of Metz Museum (**A-E**, © Museum of La Cour d'Or - Metz Métropole) and Sandy Bartle (**F**).

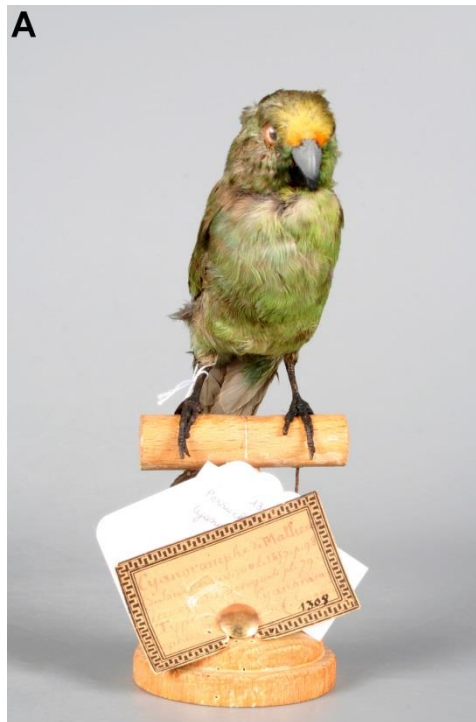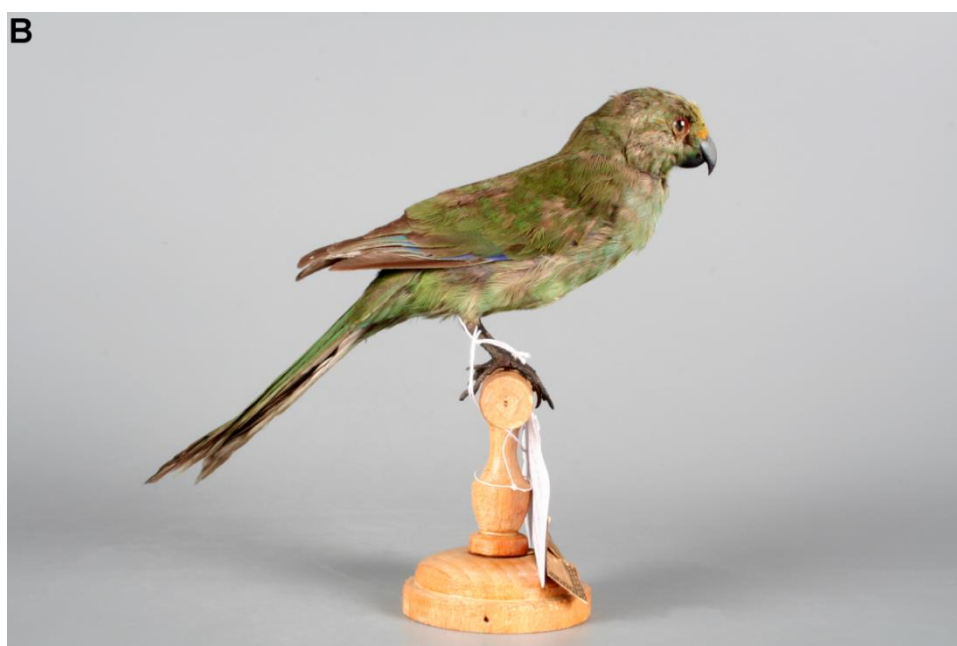

C

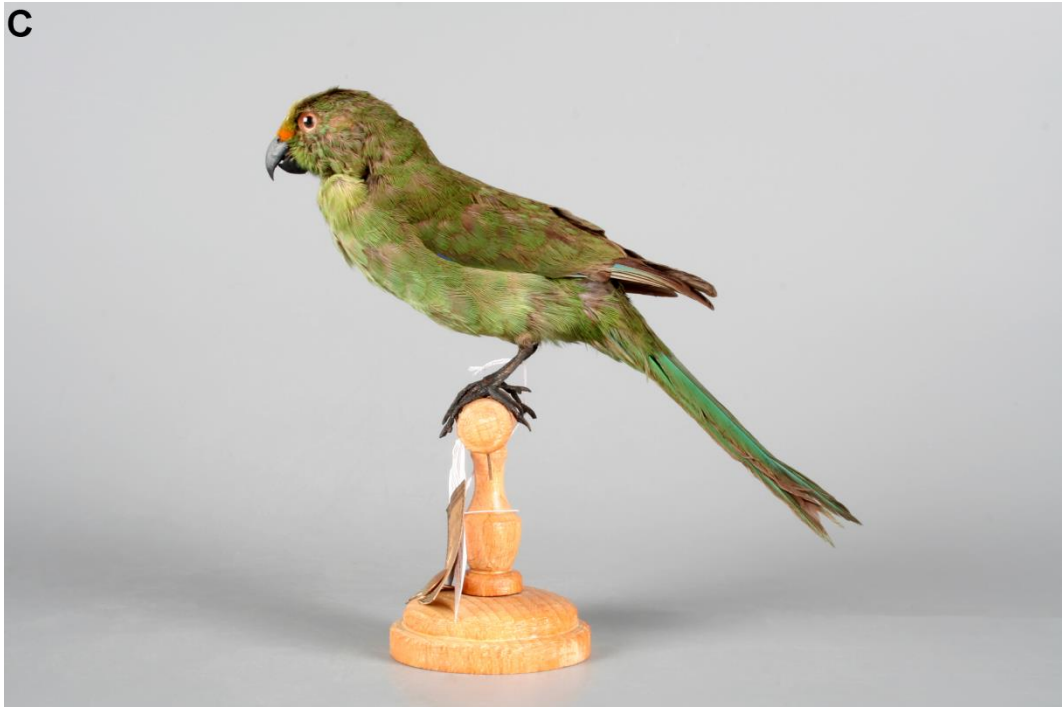

D

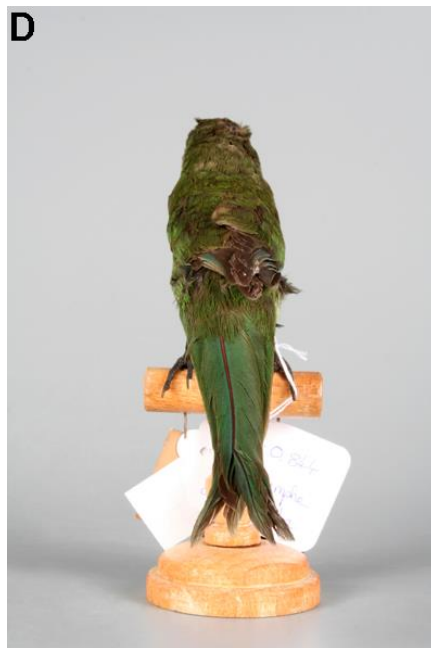

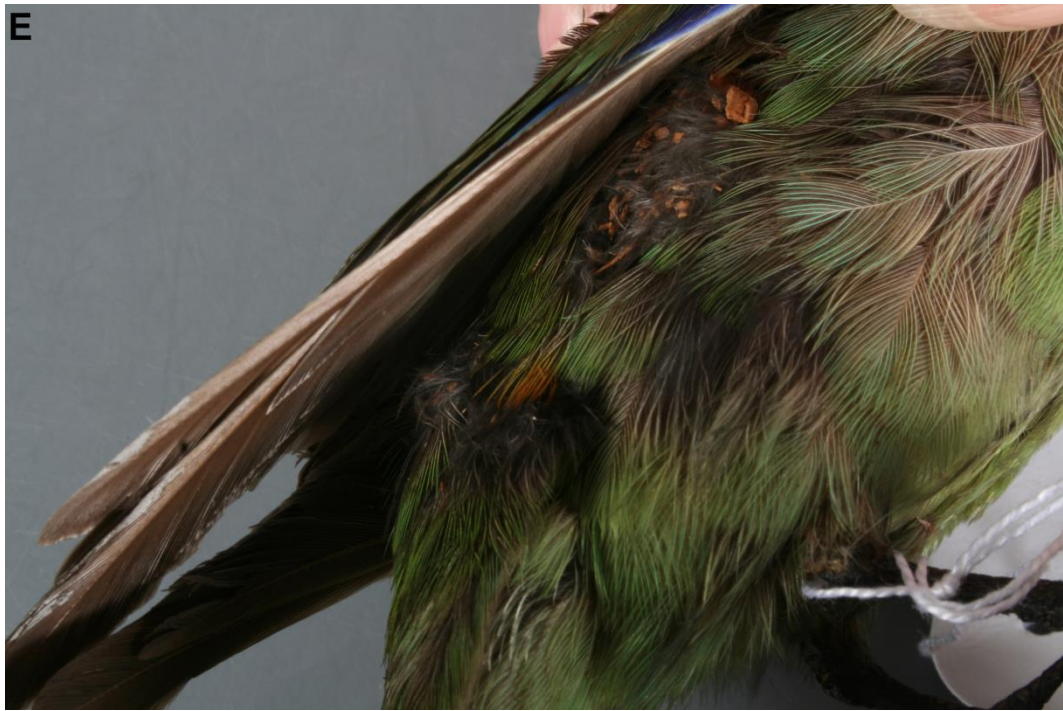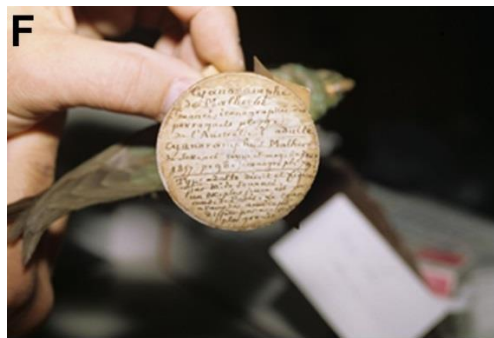

Supplement: Supplementary file 1 [file 1]
