# Supplementary material
Source: publisher figshare collection journal article supplement (https://tandf.figshare.com/articles/dataset/_/1603322)
Supplement: Supplementary file 3 [file 1]

**Appendix S4** The orange-fronted parakeet (*Cyanoramphus malherbi* Souance, 1857)

Muséum National d'Histoire Naturelle, Paris, syntype. **A:** Ventral view; **B:** Dorsal view; **C:** Lateral view; **D:** Back of newest specimen label; **E:** Type label associated with specimen; **F:** Oldest inscription on the base of the specimen mount. Photos courtesy of Museum National d'Histoire Naturelle, Paris (©Museum National d'Histoire Naturelle, Paris).

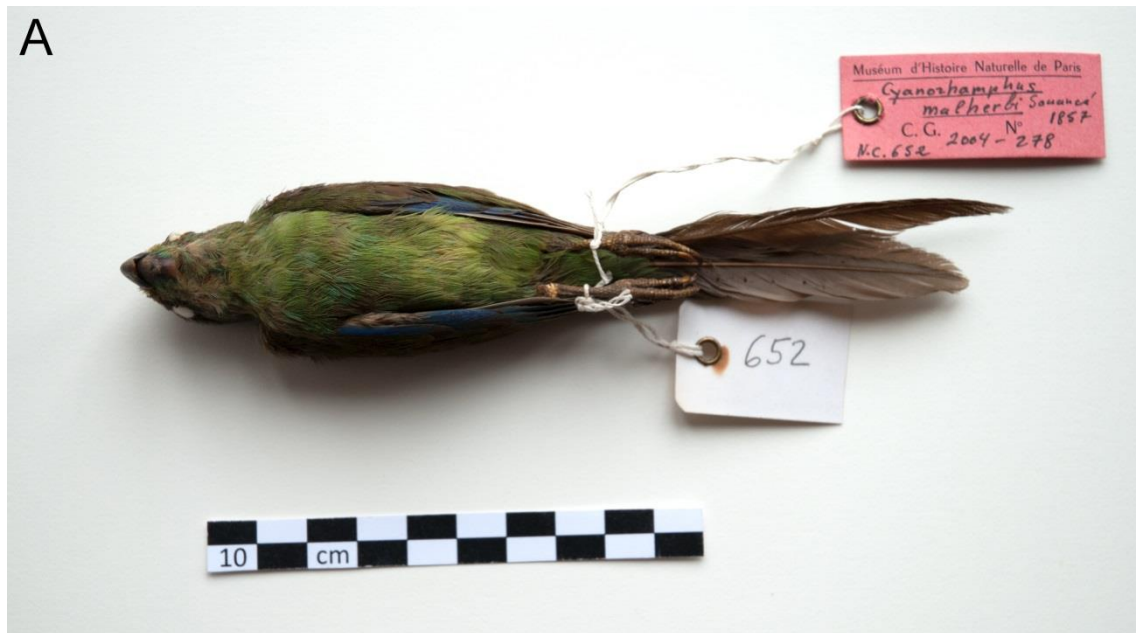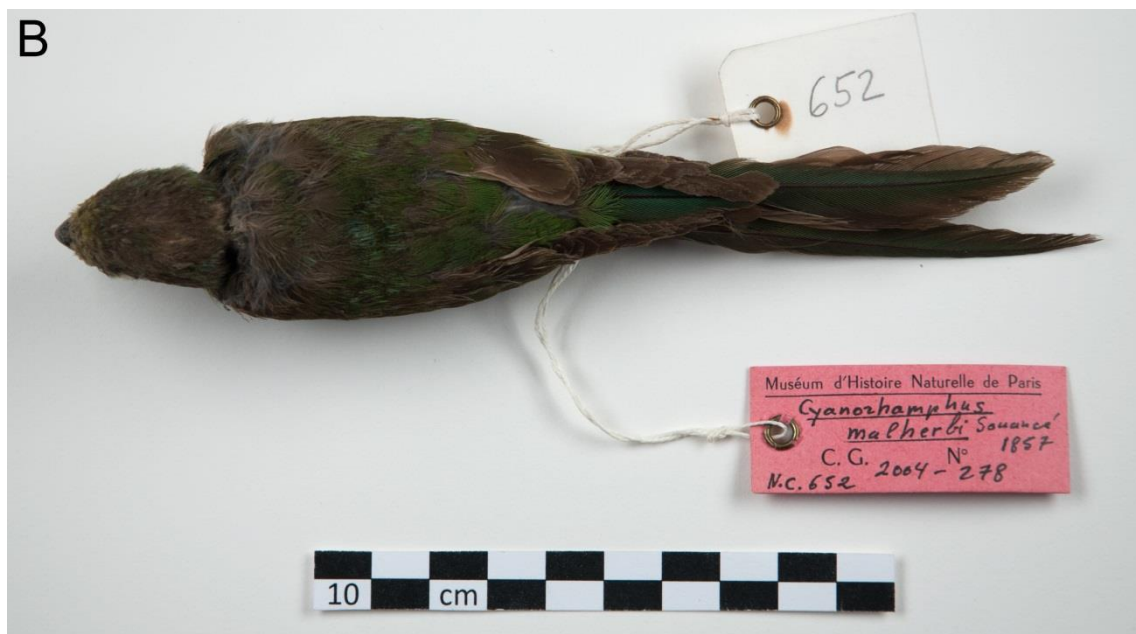

C

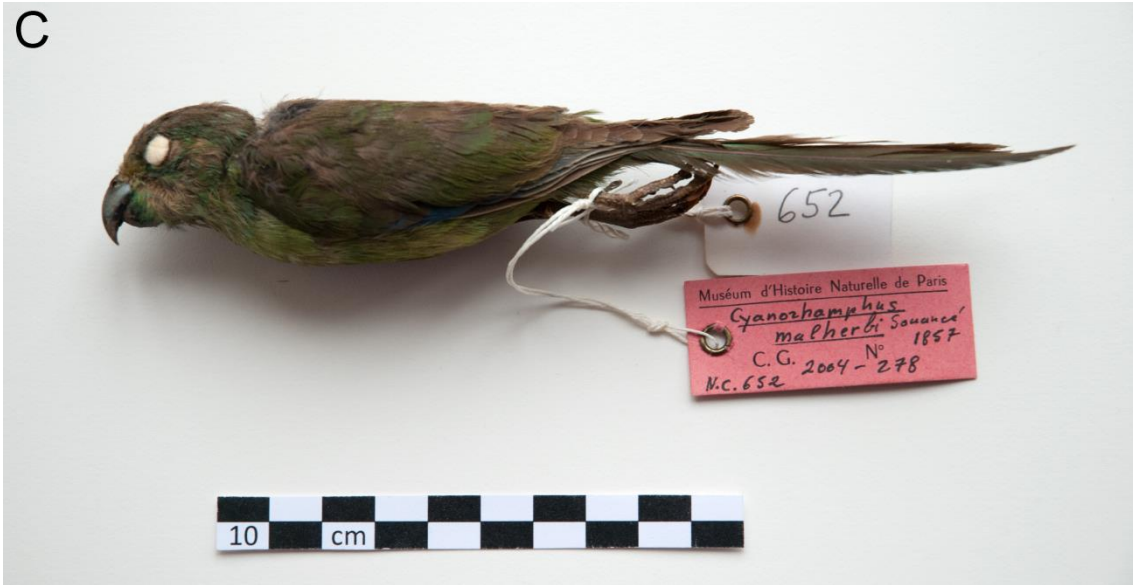

D

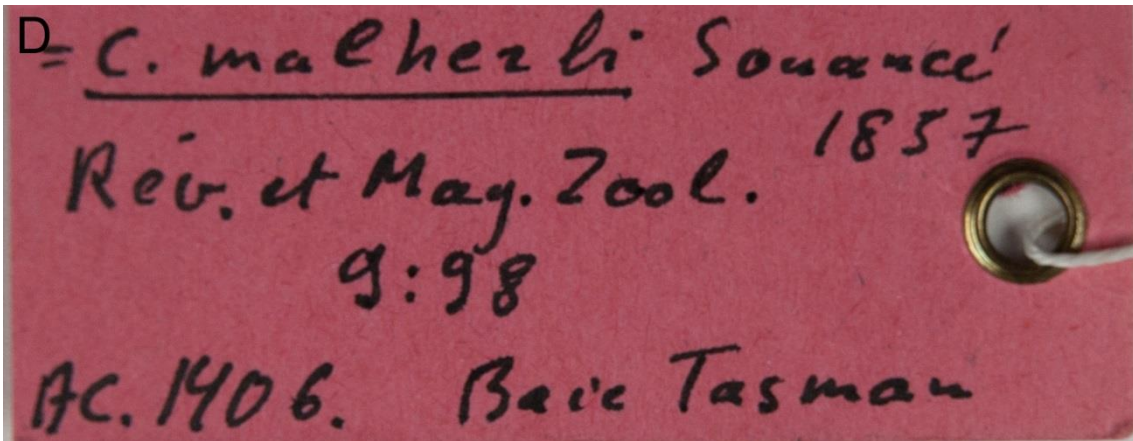

E

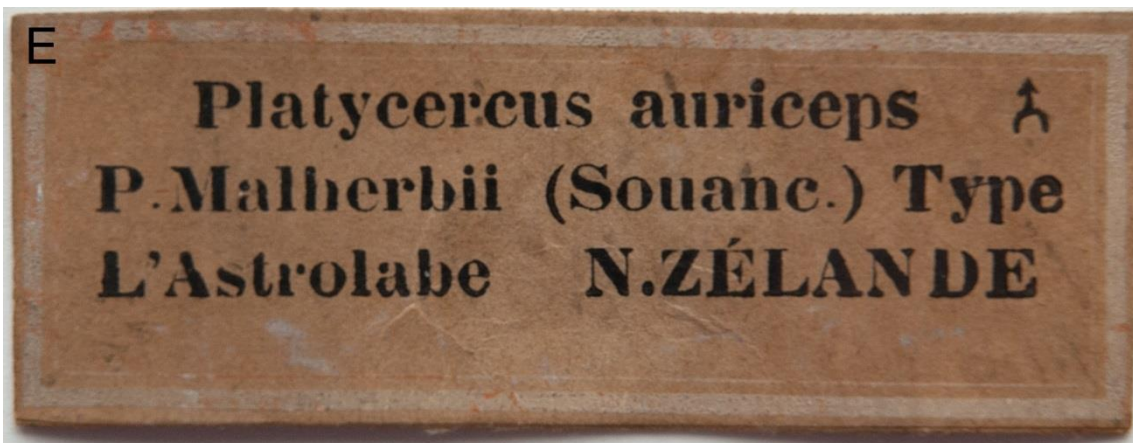

F

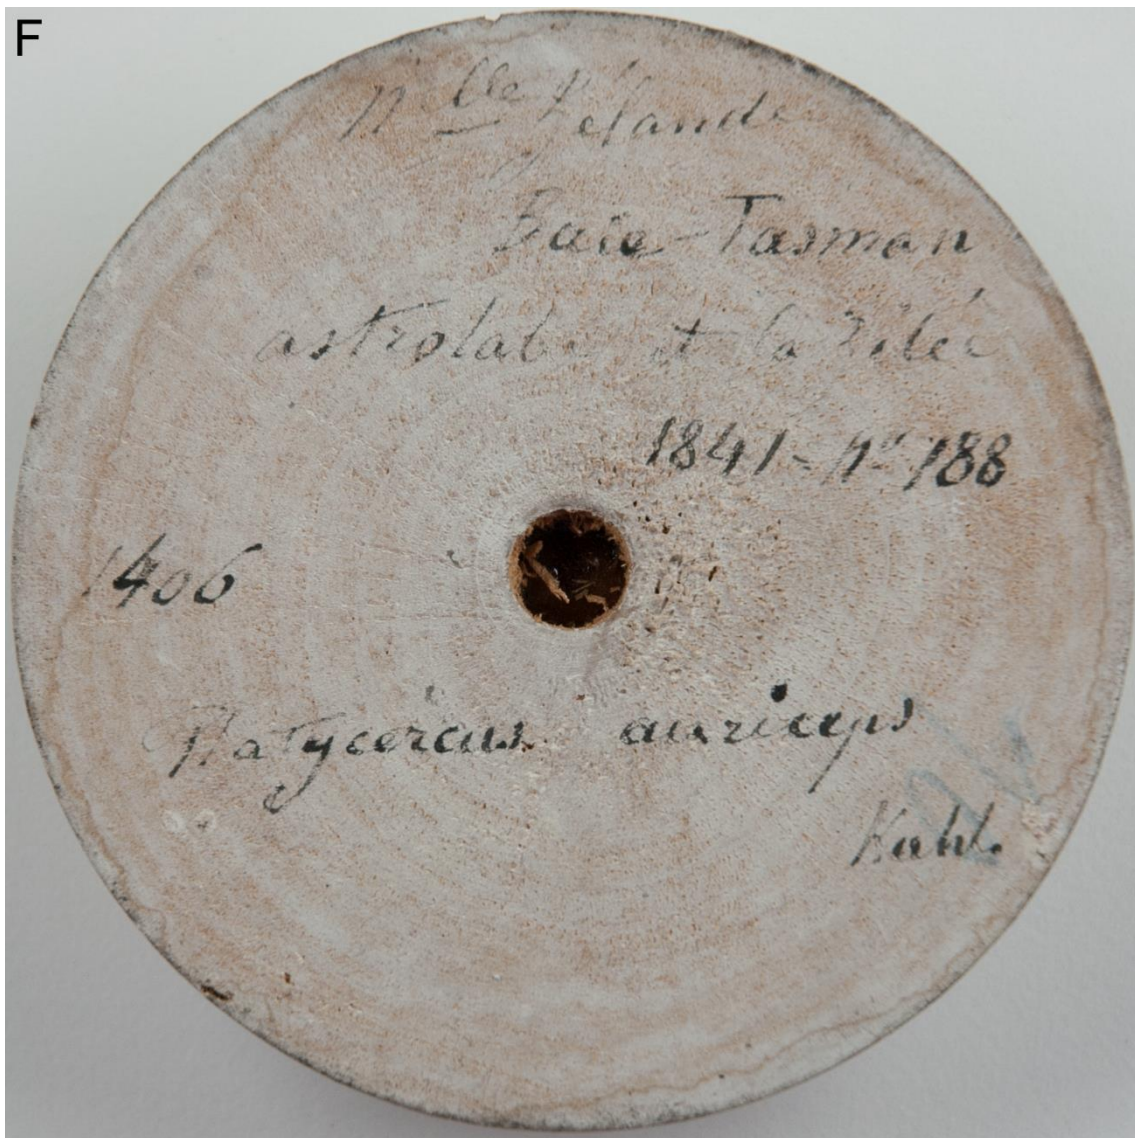

M. de Lafontaine

Isle-Tasman

astrolabe et la pile

1841-1888

1406

Platycercus auriceps

Kahl.
