# Supplementary material
Source: publisher figshare collection journal article supplement (https://tandf.figshare.com/articles/dataset/_/1603322)
Supplement: Supplementary file 4 [file 1]

**Appendix S1** *Cyanoramphus* specimens used for sequences generated in this study. Specimens in **bold** represent samples that did not yield amplifiable DNA. Abbreviations are as follows: AM, Auckland Museum; CM, Canterbury Museum; NMNZ, Museum of New Zealand Te Papa Tongarewa; OM, Otago Museum; VUW, Victoria University of Wellington (School of Biological Science); MM, Metz Museum, France. GenBank numbers KT596958-KT597050 also includes sequences generated by Boon et al. (2000, 2001a, 2001b) that were not deposited in GenBank with the original accessions (AB179749- AB179750; AF265700- AF265708; AF218739- AF218755).

| Species (morphology)                              | Collection location      | Collection date               | Voucher information  | mtDNA CR                       | GenBank no. |
|---------------------------------------------------|--------------------------|-------------------------------|----------------------|--------------------------------|-------------|
| <i>Cyanoramphus novaezelandiae novaezelandiae</i> | Adams Island             | Blood (2004)                  | VUW AD0              | <i>C. n. novaezelandiae II</i> | KT596975    |
| <i>C. n. noveazelandiae</i>                       | Adams Island             | Blood (2004)                  | VUW AD2              | <i>C. n. novaezelandiae II</i> | KT596964    |
| <i>C. n. noveazelandiae</i>                       | Adams Island             | Blood (2004)                  | VUW AD4              | <i>C. n. novaezelandiae II</i> | KT596965    |
| <i>C. n. noveazelandiae</i>                       | Adams Island             | Blood (2004)                  | VUW AD5              | <i>C. n. novaezelandiae II</i> | KT596966    |
| <i>C. n. noveazelandiae</i>                       | Adams Island             | Blood (2004)                  | VUW AD7              | <i>C. n. novaezelandiae II</i> | KT596967    |
| <i>C. n. noveazelandiae</i>                       | Adams Island             | Blood (2004)                  | VUW AD8              | <i>C. n. novaezelandiae II</i> | KT596968    |
| <i>C. n. noveazelandiae</i>                       | Adams Island             | Blood (2004)                  | VUW AD9              | <i>C. n. novaezelandiae II</i> | KT596969    |
| <i>C. n. noveazelandiae</i>                       | Adams Island             | Blood (2004)                  | VUW AD11             | <i>C. n. novaezelandiae II</i> | KT596970    |
| <i>C. n. noveazelandiae</i>                       | Adams Island             | Blood (2004)                  | VUW AD12             | <i>C. n. novaezelandiae II</i> | KT596971    |
| <i>C. n. noveazelandiae</i>                       | Adams Island             | Blood (2004)                  | VUW AD13             | <i>C. n. novaezelandiae II</i> | KT596972    |
| <i>C. n. noveazelandiae</i>                       | Adams Island             | Blood (2004)                  | VUW AD14             | <i>C. n. novaezelandiae II</i> | KT596973    |
| <i>C. n. noveazelandiae</i>                       | Adams Island             | Blood (2004)                  | VUW AD15             | <i>C. n. novaezelandiae I</i>  | KT596962    |
| <b><i>C. n. noveazelandiae</i></b>                | <b>Adams Island</b>      | <b>Historical skin</b>        | <b>NMNZ OR.11501</b> | -                              | -           |
| <b><i>C. n. noveazelandiae</i></b>                | <b>Adams Island</b>      | <b>Historical skin (1942)</b> | <b>NMNZ OR.25575</b> | -                              | -           |
| <i>C. n. noveazelandiae</i>                       | Enderby Island           | Historical skin (1943)        | NMNZ OR.25577        | <i>C. n. novaezelandiae II</i> | KT596990    |
| <i>C. n. noveazelandiae</i>                       | Auckland Island          | Historical skin (1944)        | NMNZ OR.25565        | <i>C. malherbi</i>             | KT596982    |
| <i>C. n. noveazelandiae</i>                       | Auckland Island          | Historical skin (1944)        | NMNZ OR.25566        | <i>C. n. novaezelandiae II</i> | KT596986    |
| <i>C. n. noveazelandiae</i>                       | Adams Island             | Historical skin (1944)        | NMNZ OR.25569        | <i>C. n. novaezelandiae II</i> | KT596987    |
| <i>C. n. noveazelandiae</i>                       | Adams Island             | Historical skin (1944)        | NMNZ OR.25570        | <i>C. n. novaezelandiae II</i> | KT596988    |
| <i>C. n. noveazelandiae</i>                       | Adams Island             | Historical skin (1944)        | NMNZ OR.25571        | <i>C. n. novaezelandiae II</i> | KT596989    |
| <i>C. n. noveazelandiae</i>                       | Ewing Island             | Historical skin (1963)        | NMNZ OR.9956         | <i>C. n. novaezelandiae II</i> | KT596985    |
| <i>C. n. noveazelandiae</i>                       | Ewing Island             | Historical skin (1963)        | NMNZ OR.9957         | <i>C. malherbi</i>             | KT596981    |
| <i>C. n. noveazelandiae</i>                       | West Coast, South Island | Historical skin (1890)        | NMNZ OR.475          | <i>C. n. novaezelandiae II</i> | KT596992    |
| <i>C. n. noveazelandiae</i>                       | Nelson                   | Historical skin (1905)        | NMNZ OR.1809         | <i>C. n. novaezelandiae II</i> | KT596993    |
| <i>C. n. noveazelandiae</i>                       | Poor Knights Islands     | Historical skin (1980)        | NMNZ OR.1980         | <i>C. n. novaezelandiae II</i> | KT596991    |
| <i>Cyanoramphus auriceps</i>                      | Auckland Island          | Historical skin (1944)        | NMNZ OR.25568        | <i>C. auriceps</i>             | KT597033    |

|                              |                             |                        |               |                               |          |
|------------------------------|-----------------------------|------------------------|---------------|-------------------------------|----------|
| <i>C. auriceps</i>           | Auckland Island             | Historical skin (1944) | NMNZ OR.25572 | <i>C. auriceps</i>            | KT597034 |
| <i>C. auriceps</i>           | Auckland Island             | Historical skin (1942) | NMNZ OR.25573 | <i>C. auriceps</i>            | KT597032 |
| <i>C. auriceps</i>           | Auckland Island             | Historical skin (1943) | NMNZ OR.25576 | <i>C. malherbi</i>            | KT596983 |
| <i>C. auriceps</i>           | Auckland Island             | Historical skin (1943) | NMNZ OR.25578 | <i>C. malherbi</i>            | KT596984 |
| <i>C. auriceps</i>           | Taranga Island              | Historical skin (1903) | NMNZ OR.4888  | <i>C. auriceps</i>            | KT597038 |
| <i>C. auriceps</i>           | Stewart Island              | Historical skin (1899) | NMNZ OR.4896  | <i>C. auriceps</i>            | KT597037 |
| <i>C. auriceps</i>           | Stewart Island              | Historical skin (1899) | NMNZ OR.4902  | <i>C. malherbi</i>            | KT597018 |
| <i>C. auriceps</i>           | D'Urville Island            | Historical skin (1913) | NMNZ OR.4971  | <i>C. malherbi</i>            | KT597019 |
| <i>C. auriceps</i>           | Herekopare/Te Marama Island | Historical skin        | NMNZ OR.4972  | <i>C. auriceps</i>            | KT597035 |
| <i>C. auriceps</i>           | Puwai Long Island           | Historical skin (1964) | NMNZ OR.11329 | <i>C. auriceps</i>            | KT597040 |
| <i>C. auriceps</i>           | Top House Nelson            | Historical skin (1933) | NMNZ OR.18643 | <i>C. auriceps</i>            | KT597039 |
| <i>C. auriceps</i>           | Lake Waikaremoana           | Historical skin (1974) | NMNZ OR.19463 | <i>C. auriceps</i>            | KT597041 |
| <i>C. auriceps</i>           | Taupo                       | Historical skin (1978) | NMNZ OR.21507 | <i>C. auriceps</i>            | KT597036 |
| <i>C. auriceps</i>           | Whirinaki Forest            | Historical skin (1981) | NMNZ OR.22383 | <i>C. auriceps</i>            | KT597043 |
| <i>C. auriceps</i>           | Hope River                  | Historical skin (1979) | NMNZ OR.22696 | <i>C. auriceps</i>            | KT597042 |
| <i>C. auriceps</i>           | Tararua Mountains           | Historical skin (1999) | NMNZ OR.25842 | <i>C. auriceps</i>            | KT597044 |
| <i>Cyanoramphus malherbi</i> | Unknown location            | Historical skin        | OM Av448      | <i>C. auriceps</i>            | KT597010 |
| <i>C. malherbi</i>           | Unknown location            | Historical skin        | OM Av449      | <i>C. auriceps</i>            | KT597011 |
| <i>C. malherbi</i>           | Unknown location            | Historical skin (1874) | OM Av712      | -                             | -        |
| <i>C. malherbi</i>           | Nelson                      | Historical skin (1856) | AM 4179       | -                             | -        |
| <i>C. malherbi</i>           | Otago or Nelson             | Historical skin (1885) | AM 7869       | -                             | -        |
| <i>C. malherbi</i>           | Owen Junction               | Historical skin (1928) | CM Av63       | <i>C. auriceps</i>            | KT597008 |
| <i>C. malherbi</i>           | Takaka                      | Historical skin (1915) | CM Av64       | <i>C. auriceps</i>            | KT597009 |
| <i>C. malherbi</i>           | Unknown location            | Historical skin        | CM Av2060     | -                             | -        |
| <i>C. malherbi</i>           | Unknown location            | Historical skin        | CM Av2061     | -                             | -        |
| <i>C. malherbi</i>           | Unknown location            | Historical skin        | CM Av2074     | <i>C. malherbi</i>            | KT597016 |
| <i>C. malherbi</i>           | Nelson                      | Historical skin (1896) | CM Av2075     | <i>C. auriceps</i>            | KT597017 |
| <i>C. malherbi</i>           | Stewart Island              | Historical skin (1904) | NMNZ OR.472   | <i>C. auriceps</i>            | KT597012 |
| <i>C. malherbi</i>           | Unknown location            | Historical skin        | NMNZ OR.4825  | -                             | -        |
| <i>C. malherbi</i>           | Waiarapa                    | Historical skin        | NMNZ OR.13877 | -                             | -        |
| <i>C. malherbi</i>           | Lake Sumner                 | Historical skin (1981) | NMNZ OR.22273 | <i>C. auriceps</i>            | KT597013 |
| <i>C. malherbi</i>           | Lake Sumner                 | Historical skin (1981) | NMNZ OR.22274 | <i>C. auriceps</i>            | KT597014 |
| <i>C. malherbi</i>           | Unknown Locality (captive)  | Historical skin (1996) | NMNZ OR.25784 | <i>C. n. novaezelandiae</i> 1 | KT597015 |
| <i>C. malherbi</i>           | “South Island”              | Historical skin        | MM 1309       | -                             | -        |
